# Supplementary material
Source: publisher figshare collection journal article supplement (https://acs.figshare.com/ndownloader/files/5054710)
Supplement: Supplementary file 1 [file 5054710]

**Supplementary information for “Periodic inclusion of room-temperature-ferromagnetic metal phosphide nanoparticles in carbon nanotubes” by Jourdain et al.**

S1 - Distribution of the nanoparticles length (along the nanotube symmetry axis) and width (perpendicular to the nanotube symmetry axis): N=73

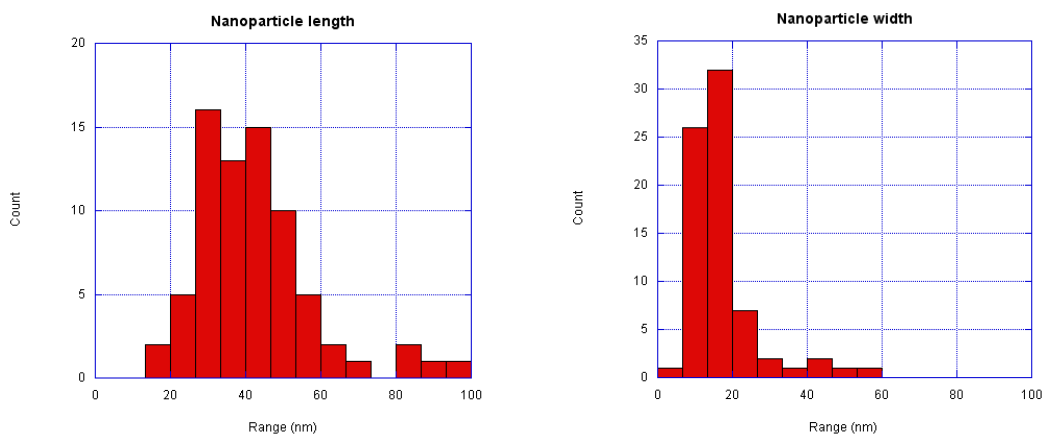

S2 a,b – Low magnification TEM images of the grids used for the microscopic characterization (Co-Fe-P sample) (separate image files)
